# Supplementary material for: Conception automatique de systèmes embarqués pour la téléphonie mobile 3G
Source: MDPI journal article supplement (doi:10.3390/toxins14060366), 2006-01-01
Supplement: s1 [file s1]

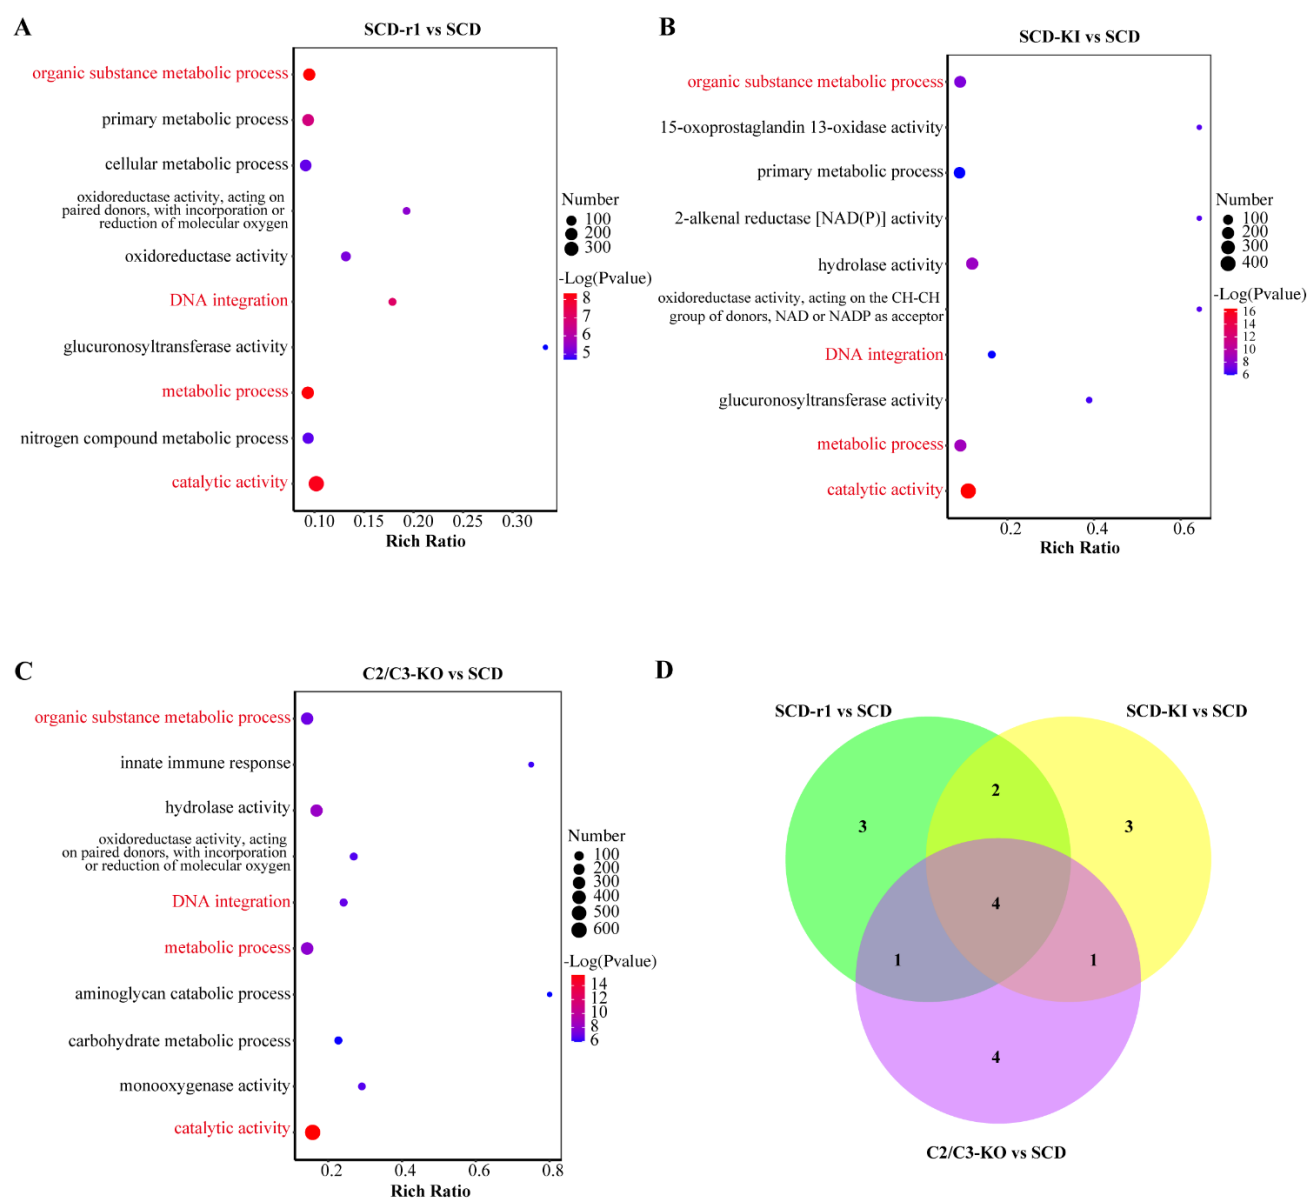

**Figure S2.** Gene ontology (GO) analysis of differentially expressed genes (DEGs) between the three resistance strains and the susceptible SCD strain without Cry1Ac exposure. (A-C) The most significantly ( $p < 0.05$ ) enriched 10 (Top 10) GO terms for the DEGs in the three resistant strains. (D) Venn diagram analysis of the Top 10 GO terms enriched by the DEGs in the three resistance strains.
