# Supplementary material for: Conception automatique de systèmes embarqués pour la téléphonie mobile 3G
Source: MDPI journal article supplement (doi:10.3390/toxins14060366), 2006-01-01
Supplement: s1 [file s1]

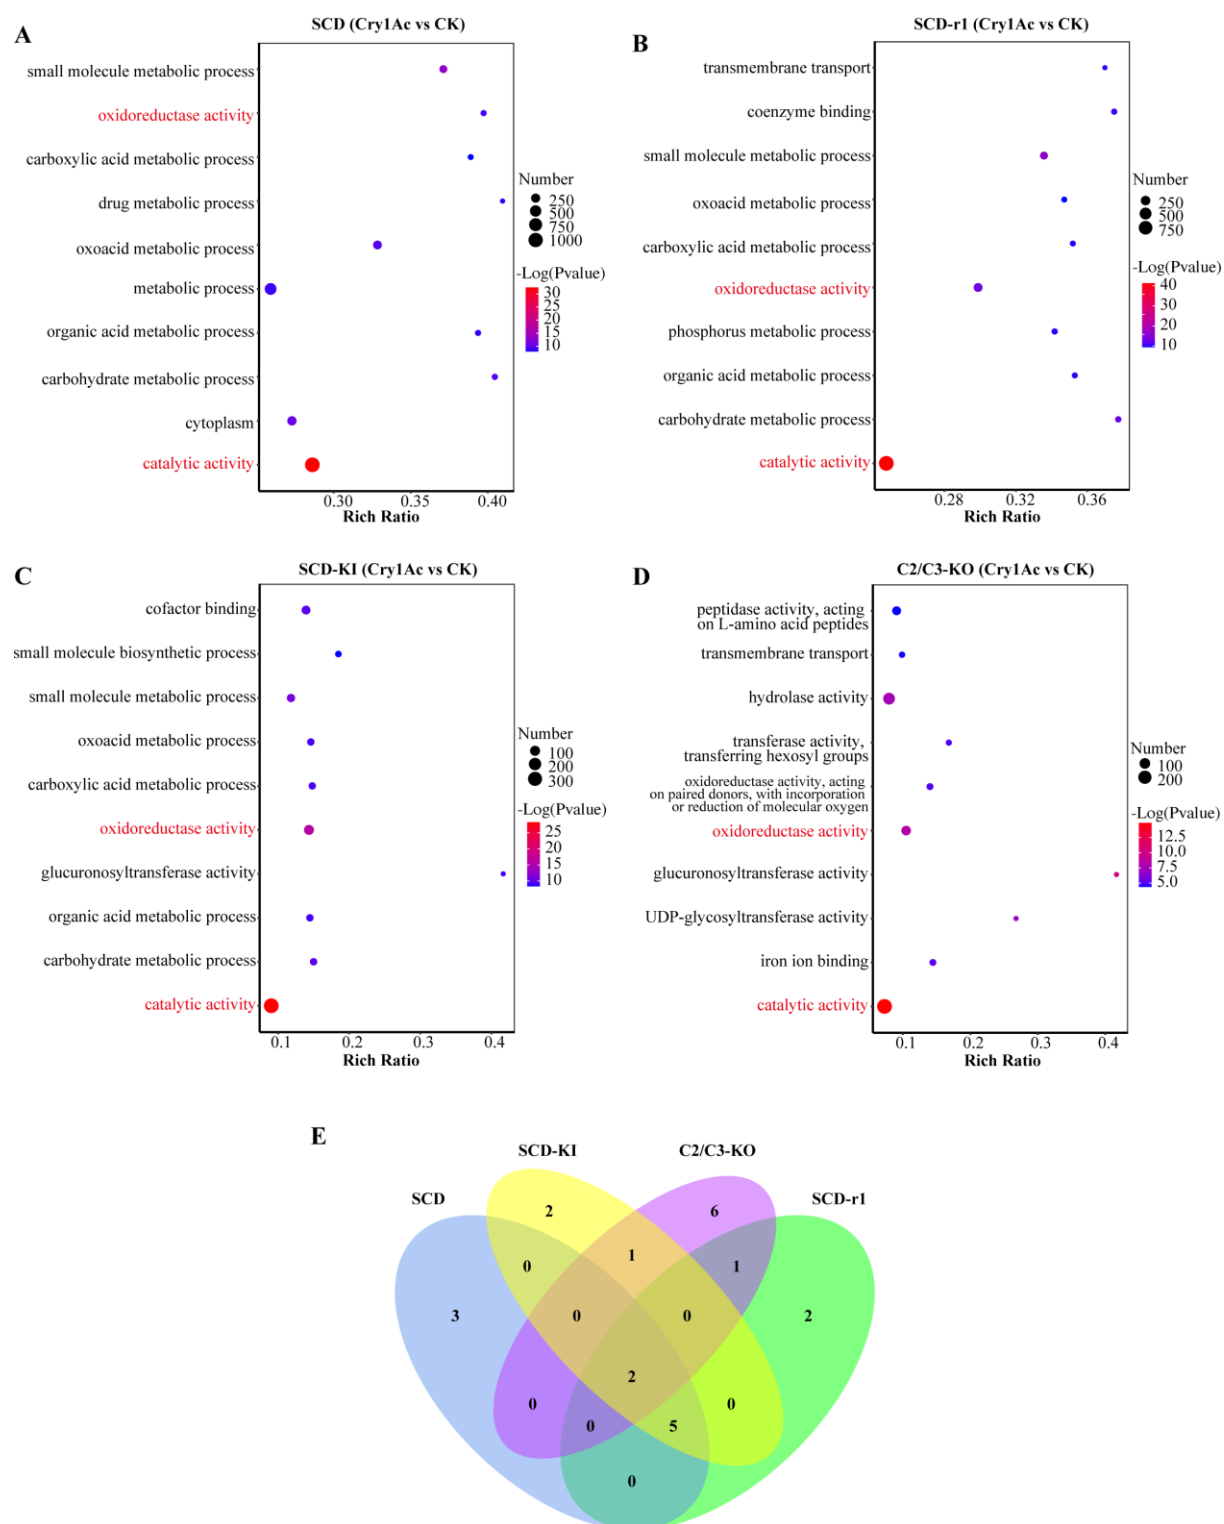

**Figure S3.** GO analysis of DEGs in Cry1Ac-treated larvae as compared to the control larvae for each strain. (A-D) The Top 10 GO terms ( $p < 0.05$ ) for the DEGs in each strain in response to Cry1Ac exposure. (E) Venn diagram analysis of the Top 10 GO terms enriched by the DEGs in the four strains after Cry1Ac exposure.
