# Supplementary material for: Conception automatique de systèmes embarqués pour la téléphonie mobile 3G
Source: MDPI journal article supplement (doi:10.3390/toxins14060366), 2006-01-01
Supplement: s1 [file s1]

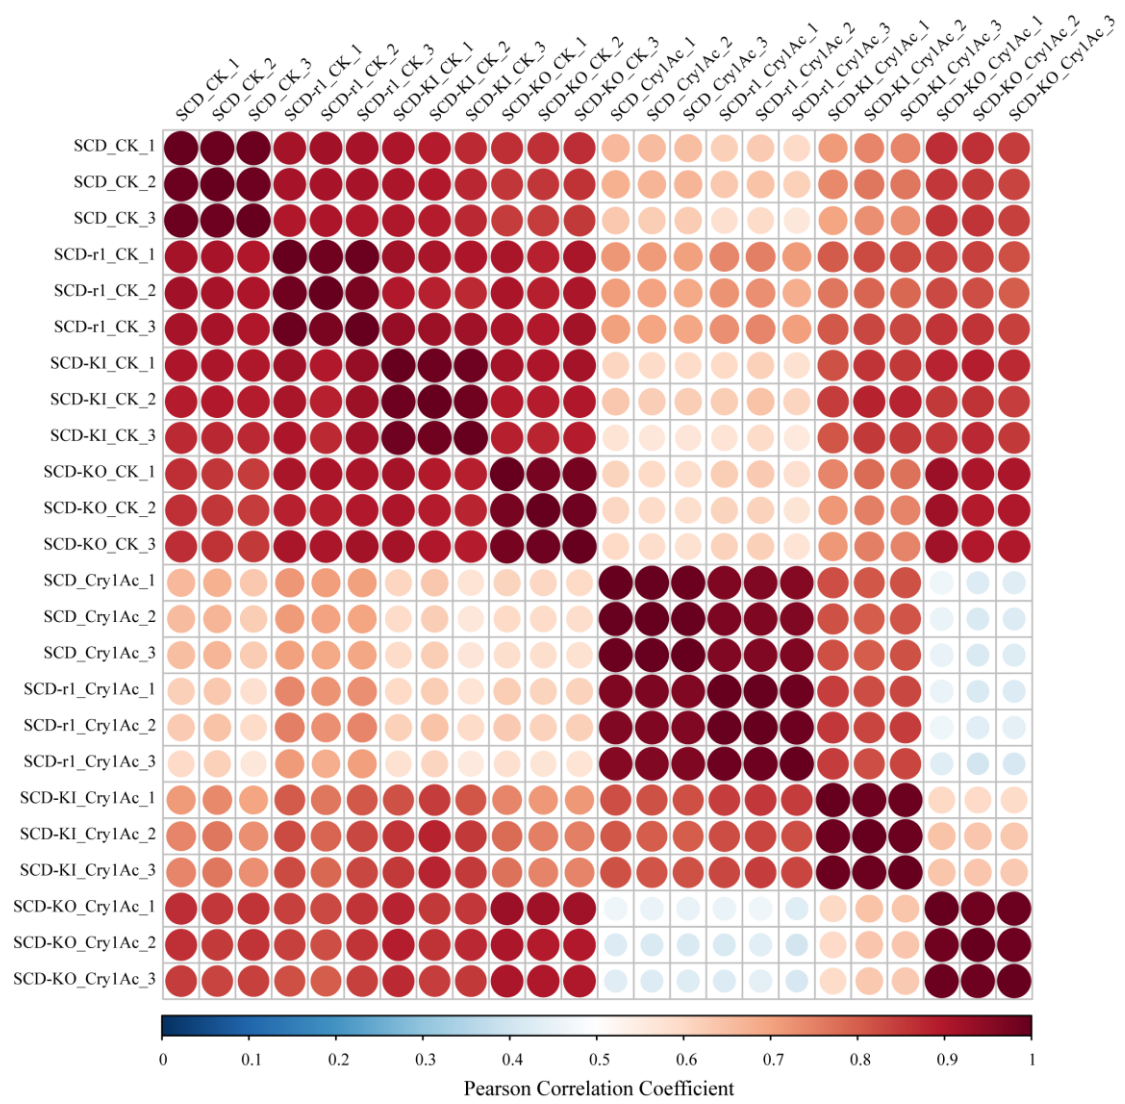

**Figure S1.** Correlation analysis of all samples. Coloring indicates Pearson correlation (high: red; low: blue).
